# Supplementary material
Source: PubMed Central journal article supplement (PMC7781463)
Supplement: ofaa561_suppl_supplementary_materials.pdf [file ofaa561_suppl_supplementary_materials.pdf]

**Supplemental Data for:**  
**Sleep Disorders in HIV: A Substudy of the Pharmacokinetics and Clinical Observations in People Over Fifty (POPPY) Study**

**Authors:**

Ken M. Kunisaki, MD, MS<sup>1,2</sup>, Davide De Francesco<sup>3</sup>, Caroline A. Sabin<sup>3</sup>, Alan Winston<sup>4</sup>, Patrick W. G. Mallon<sup>5</sup>, Jane Anderson<sup>6</sup>, Emmanouil Bagkeris<sup>3</sup>, Marta Boffito<sup>7</sup>, Nicki Doyle<sup>4</sup>, Lewis Haddow<sup>3,8</sup>, Frank Post<sup>9</sup>, Memory Sachikonye<sup>10</sup>, Jaime Vera<sup>11</sup>, Wajahat Khalil<sup>1,2</sup>, Susan Redline<sup>12,13,14</sup>

1: Minneapolis Veterans Affairs Health Care System, Minneapolis/USA; 2: University of Minnesota, Minneapolis/USA; 3: University College London, London/UK; 4: Imperial College London, London/UK; 5: University College Dublin, Dublin/Ireland; 6: Homerton University Hospital, London/UK; 7: Chelsea and Westminster Healthcare NHS Foundation Trust, London/UK; 8: Kingston Hospital NHS Foundation Trust, London/UK; 9: King's College Hospital NHS Foundation Trust, London/UK; 10: UK Community Advisory Board (UK-CAB), London/UK; 11: Brighton and Sussex Medical School, Brighton/UK; 12: Brigham and Women's Hospital, Boston/USA; 13: Beth Israel Deaconess Medical Center, Boston/USA; 14: Harvard Medical School, Boston/USA

**Supplemental Figure: Overlap between insomnia (by Insomnia Severity Index questionnaire), restless legs syndrome (RLS, by International Restless Legs Syndrome Study Group questionnaire), and sleep apnea (SA, by overnight oximetry testing) in persons with HIV (PWH) (n=321) and HIV-negative individuals (n=118).**

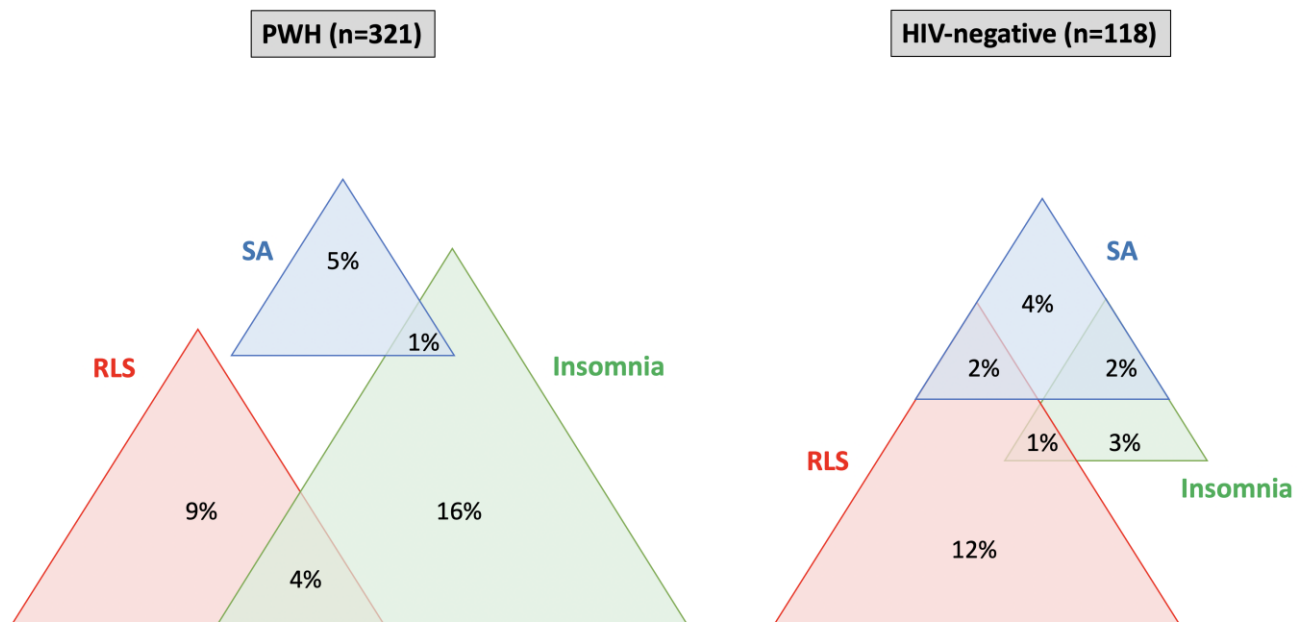

**Supplemental Table: Association of number of sleep disorders with outcomes in persons with HIV (PWH) and HIV-negative individuals, separately, with p-value to assess the interaction with HIV.**

| Outcome                         | PWH (n=319)          |                      |                      |             | HIV-negative (n=116) |                      |                      |             | p for interaction |
|---------------------------------|----------------------|----------------------|----------------------|-------------|----------------------|----------------------|----------------------|-------------|-------------------|
|                                 | 0 disorders (n=207)  | 1 disorder (n=97)    | ≥2 disorders (n=17)  | Adjusted* p | 0 disorders (n=91)   | 1 disorder (n=22)    | ≥2 disorders (n=5)   | Adjusted* p |                   |
| SF-36 Physical Score            | 52.7<br>(44.2, 56.8) | 48.6<br>(39.2, 54.1) | 36.8<br>(32.1, 46.4) | <0.001      | 55.1<br>(52.5, 57.8) | 55.7<br>(53.2, 57.5) | 52.3<br>(46.1, 54.9) | 0.45        | 0.02              |
| SF-36 Mental Score              | 52.8<br>(44.5, 57.6) | 44.4<br>(34.6, 55.1) | 38.9<br>(31.6, 41.7) | <0.001      | 55.1<br>(50.6, 58.2) | 53.8<br>(45.4, 59.5) | 52.3<br>(45.6, 53.9) | 0.11        | 0.04              |
| PROMIS Sleep Disturbance        | 49.0<br>(44.2, 54.3) | 57.3<br>(50.1, 61.5) | 60.4<br>(57.3, 62.6) | <0.001      | 46.7<br>(42.9, 51.2) | 49.6<br>(42.9, 55.3) | 63.7<br>(53.3, 64.9) | 0.02        | 0.07              |
| PROMIS Sleep-Related Impairment | 47.3<br>(43.6, 54.0) | 56.1<br>(48.9, 61.3) | 62.3<br>(60.3, 65.3) | <0.001      | 45.5<br>(38.7, 50.3) | 45.5<br>(41.4, 48.9) | 63.3<br>(50.3, 63.3) | 0.27        | 0.002             |

\*: adjusted for age, sex and ethnicity
